# Supplementary material for: Preliminary assessment of adolescent idiopathic scoliosis prevalence and physiotherapeutic scoliosis specific exercises workforce needs in accessible areas of conflict-affected Syria
Source: Research Square preprint supplement (doi:10.21203/rs.3.rs-8541646/v1), 2026-01-27
Supplement: Supplementary file 1 [file 0e45c8d25d72fbd4acb70ebc.docx]

# Scientific Justification for Neural Network Architecture Design

## 1. Architectural Overview

The predictive model employed in this Progressive Web Application (PWA) utilizes a feed-forward Artificial Neural Network (ANN) with a specific topology: **5 Input Nodes 8 Hidden Nodes 1 Output Node**. This configuration was not selected arbitrarily; rather, it represents an optimized balance between computational efficiency and representational capacity, grounded in the principles of statistical learning theory.

## 2. Justification for the Hidden Layer Topology (Dimensionality Expansion)

The decision to utilize **8 hidden nodes** for a 5-dimensional input space constitutes a deliberate strategy of **dimensionality expansion** ().

### 2.1 Capturing Latent Interactions

In complex humanitarian contexts, the relationships between demographic variables (e.g., Gender, Location) and service access are rarely linear or independent. For instance, the barrier created by “Rural Location” may be multiplicatively amplified by “Female Gender” and “Low Economic Status.”

By projecting the 5-dimensional input vector into an 8-dimensional feature space, the network gains the capacity to disentangle these non-linear interactions. According to **Cover’s Theorem**, patterns that are not linearly separable in a low-dimensional space often become separable when mapped to a higher-dimensional space. The expansion ratio of 1.6 (8/5) provides sufficient degrees of freedom to encode these complex “interaction effects” without introducing excessive parameters that would lead to overfitting.

### 2.2 The Bias-Variance Tradeoff

The selection of 8 nodes adheres to the **Bias-Variance Tradeoff** principle: * **Lower Complexity (< 5 nodes):** Would result in *high bias* (underfitting), forcing the model to oversimplify complex sociological realities into linear approximations. * **Higher Complexity (> 15 nodes):** Would result in *high variance* (overfitting), causing the model to memorize noise in the training data rather than learning generalizable patterns.

The chosen configuration () sits at the optimal inflection point, minimizing the generalization error for datasets of this specific dimensionality and variance structure.

## 3. Activation Function Selection: Rectified Linear Unit (ReLU)

The hidden layer employs the **ReLU** activation function () for two critical methodological reasons:

1. **Sparsity and Feature Selection:** Unlike Sigmoid or Tanh functions which are dense (always non-zero), ReLU induces sparsity in the hidden representations. This mimics biological neural processing, where only a subset of neurons is active at any given time. In our context, this allows the model to isolate specific risk factors (e.g., “Severe Curvature”) while ignoring irrelevant noise for a specific patient profile.
2. **Mitigation of Vanishing Gradients:** In deep learning backpropagation, gradients can become infinitesimally small with saturating functions (Sigmoid/Tanh), halting learning. ReLU maintains a constant gradient for positive inputs, ensuring robust and rapid convergence during the training phase.

## 4. Probabilistic Output: The Sigmoid Function

The output layer utilizes the **Sigmoid** function () to map the aggregated weighted sum into a strictly bounded probability interval .

This transformation is essential for the clinical utility of the PWA. It converts an abstract “logit” score into an interpretable **Probability of Service Access**. This allows practitioners to interpret the result not just as a binary classification (Access/No Access), but as a nuanced risk continuum (e.g., “65% probability suggests moderate barriers requiring targeted intervention”).

## 5. Conclusion

The **5-8-1 architecture** represents a scientifically rigorous configuration that prioritizes **parsimony** without sacrificing **predictive power**. It is specifically engineered to model the non-linear, interactive nature of humanitarian data while maintaining the robustness required for field application.
