# Supplementary material for: Preliminary assessment of adolescent idiopathic scoliosis prevalence and physiotherapeutic scoliosis specific exercises workforce needs in accessible areas of conflict-affected Syria
Source: Research Square preprint supplement (doi:10.21203/rs.3.rs-8541646/v1), 2026-01-27
Supplement: Supplementary file 3 [file 2989517a3f21bd767deefe9c.docx]

**Appendix 2:**

**Analysis of Contextual and Field-Based Factors Influencing Study Implementation**

**1. Data Collection Methodology and Privacy Protection**

**1.1 Anonymized Data System**

This study was designed using a fully anonymized data system, whereby all personal identifiers and information that could enable participant identification were systematically excluded. No data were collected or recorded regarding names, identification numbers, addresses, telephone numbers, or any detailed demographic information that could facilitate re-identification.

Rationale for Anonymized Raw Data Utilization:

The use of de-identified raw data provides several critical advantages within the complex humanitarian and security context of Syria:

First, security protection is paramount. In an environment characterized by ongoing security instability, minimizing the risk of personal data breaches protects participants from potential harassment or targeting. Parents and adolescents demonstrated greater willingness to participate when assured that their children's data would not be linked to their identities.

Second, scientific transparency is enhanced. Anonymized raw data permits independent verification and secondary analysis without concerns regarding privacy violations. Other researchers can validate calculations and findings without accessing sensitive information.

Third, ethical compliance is assured. This approach aligns with international standards for research ethics as outlined in the Declaration of Helsinki and humanitarian principles, particularly in sensitive contexts. There exists no risk of personal data misuse for political or security purposes.

Fourth, long-term sustainability is facilitated. Anonymized data can be securely archived for extended periods without privacy concerns, enabling longitudinal studies and future comparative analyses.

**1.2 Site Selection Criteria and Informed Consent**

Screening sites (schools and community centers) were selected according to specified criteria reflecting the operational field reality:

Informed Consent Criterion: This was the fundamental and decisive criterion. Sites were approached where parents and adolescents demonstrated willingness to participate following clear and comprehensive explanation of the study's objectives and procedures. Consent was predominantly verbal (given relatively elevated literacy limitations in certain areas) and was documented through field team records without linkage to personal identifiers.

Geographic Availability of Trained Specialists Criterion: Screening sites were selected according to geographic accessibility of available trained physiotherapists. This criterion ensured that screening procedures could be conducted by personnel with appropriate training and competency, thereby maintaining methodological consistency and data quality. Sites were prioritized where trained screening personnel were available within reasonable geographic proximity.

Security and Logistical Access Criterion: The study was restricted to areas accessible with adequate security assurance and logistical feasibility. This geographic constraint resulted in exclusion of remote rural areas and regions experiencing ongoing security instability.

Target Population Density Criterion: Priority was accorded to sites with high concentration of adolescents within the target age range (10-18 years).

**2. Raw Data and Actual Rates**

**2.1 Participant Tracking from Initial Screening to Radiographic Confirmation**

| Study Phase | Number | Percentage |
| --- | --- | --- |
| Adolescents screened with initial assessment | 2,847 | 100% |
| Suspected cases (ATR ≥ 7°) | 158 | 5.55% |
| Cases followed up with informed consent | 71 | 44.9% of suspected cases |
| Cases confirmed by radiography (Cobb ≥ 10°) | 71 | 100% of followed-up cases |

Methodological Note: The 71 cases followed up represent the same cohort as those confirmed radiographically, indicating that all suspected cases receiving parental informed consent completed radiographic assessment successfully. The 44.9% follow-up rate reflects the proportion of suspected cases for which parental informed consent was obtained and participants were able to access radiographic facilities.

**2.2 Distribution of Confirmed Cases**

Among the 71 radiographically confirmed cases:

- Mild curves (10-19°): 52 cases (73.2%)
- Moderate curves (20-39°): 14 cases (19.7%)
- Severe curves (≥40°): 5 cases (7.0%)
- Risser 0-2 (High Risk): 42 (59.15%)
- Risser 4-5 (Low Risk): 22 (30.99%)

Total amenable to conservative management (10-39°): 66 cases (93.0%)

**3. Factors Influencing Consent and Follow-up Rates**

**3.1 Community Trust and Health Literacy**

Community trust in medical personnel and health institutions varied substantially across sites. Locations with established positive reputations for medical services demonstrated higher consent rates. Limited community understanding of scoliosis and spinal deformities reduced perceived importance of screening and follow-up, particularly for mild cases presenting without obvious symptoms.

**3.2 Social Stigma**

Pronounced social stigma associated with physical deformities, particularly affecting adolescent females, was evident. Fear that diagnosis might compromise marriage prospects or social acceptance prevented some families from participating despite adolescent willingness. This stigma-related barrier represented a significant impediment to follow-up completion.

**3.3 Economic and Geographic Barriers**

Substantial distances between rural areas and urban centers containing radiographic equipment (50-100 km in certain locations), combined with transportation costs and meal expenses, constituted fundamental obstacles. Multiple security checkpoints heightened anxiety, particularly for families apprehensive about harassment or complications during transit.

**3.4 Psychological and General Health Status**

Chronic exposure to violence and displacement has produced profound psychological sequelae. Some adolescents experienced significant anxiety or depressive symptoms, reducing their capacity to participate in group activities or tolerate physical examination by unfamiliar medical personnel.

**4. Analysis of Model Coefficients**

**4.1 Effective Service Access Coefficient (β = 0.25)**

The effective service access coefficient reflects the proportion of patients requiring services who can realistically access and sustain treatment. The value β = 0.25 was selected based on comprehensive analysis of multiple barriers:

| Component | Value | Explanation |
| --- | --- | --- |
| Availability of specialized services | 0.18 | Limited proportion of facilities provide genuine specialized scoliosis services |
| Geographic accessibility | 0.40 | Geographic and security barriers substantially restrict access |
| Economic capacity | 0.30 | Majority of families live below poverty threshold |
| Social acceptance | 0.60 | Social stigma affects subset of cases |
| Psychological readiness | 0.75 | Psychological trauma affects subset of adolescents |

The value β = 0.25 reflects complex interactions among these components and represents a reasonable estimate of field reality.

**4.2 Clinical Prioritization Coefficient (α = 0.55)**

The adjusted clinical prioritization coefficient (α-adjusted = 0.93 × 0.60 ≈ 0.55) reflects the necessity of concentrating limited resources on highest-priority cases:

•High-priority cases: Moderate curves (20-39°) and mild curves with progression risk indicators (Risser 0-2)

•Lower-priority cases: Stable mild curves (Risser 4-5) amenable to less resource-intensive monitoring protocols

This differentiation ensures efficient resource utilization for maximum health impact.

**5. Scenarios and Recommendations**

**5.1 Comparative Scenarios**

| Scenario | α-adjusted | β | Number of Specialists |
| --- | --- | --- | --- |
| Base Case | 0.55 | 0.25 | 240 |
| Moderately Optimistic | 0.70 | 0.30 | 350 |

**5.2 Recommended Scenario**

The Moderately Optimistic scenario (350 specialists) is recommended as the foundation for medium-term strategic planning (3-5 years). This scenario assumes modest improvement of 5% in service access, an achievable target through targeted interventions enhancing health literacy and training medical personnel.

**6. Conclusion**

This analysis demonstrates that the follow-up rate of 44.9% reflects the complex reality of the field environment in Syria. Utilization of anonymized raw data enables comprehensive understanding of factors influencing service access without exposing participants to risk. Community trust, health literacy, economic status, social stigma, psychological status, and geographic barriers collectively determine who can access and sustain treatment services. Future interventions must address these factors in an integrated manner.
